# Supplementary material
Source: MDPI journal article supplement (https://www.mdpi.com/2673-401X/2/2/10)
Supplement: s1 [file s1]

## **A sustainable improvement of $\omega$ -bromoalkylphosphonates synthesis to access novel KuQuinones**

Mattia Forchetta<sup>1</sup>, Valeria Conte<sup>1</sup>, Giulia Fiorani<sup>2</sup>, Pierluca Galloni<sup>1,\*</sup> and Federica Sabuzi<sup>1,\*</sup>

<sup>1</sup> Department of Chemical Science and Technologies, University of Rome Tor Vergata, Via della Ricerca Scientifica snc, 00133 Rome, Italy; forchetta@scienze.uniroma2.it (M.F.); valeria.conte@uniroma2.it (V.C.).

<sup>2</sup> Department of Molecular Sciences and Nanosystems, Ca' Foscari University of Venezia, Via Torino 155, 30172 Venezia, Mestre, Italy; giulia.fiorani@unive.it

\* Correspondence: galloni@scienze.uniroma2.it (P.G.); federica.sabuzi@uniroma2.it (F.S.)

## Table of Contents

|                    |                                                                     |    |
|--------------------|---------------------------------------------------------------------|----|
| <b>Figure S1.</b>  | $^1\text{H}$ NMR spectrum of <b>1</b> in $\text{CDCl}_3$            | 3  |
| <b>Figure S2.</b>  | $^{31}\text{P}$ NMR spectrum of <b>1</b> in $\text{CDCl}_3$         | 3  |
| <b>Figure S3.</b>  | Mass spectrum of <b>1</b>                                           | 3  |
| <b>Figure S4.</b>  | $^1\text{H}$ NMR spectrum of diethyl <b>2</b> in $\text{CDCl}_3$    | 4  |
| <b>Figure S5.</b>  | $^{31}\text{P}$ NMR spectrum of diethyl <b>2</b> in $\text{CDCl}_3$ | 4  |
| <b>Figure S6.</b>  | Mass spectrum of diethyl <b>2</b>                                   | 4  |
| <b>Figure S7.</b>  | $^1\text{H}$ NMR spectrum of <b>3</b> in $\text{CDCl}_3$            | 5  |
| <b>Figure S8.</b>  | $^{31}\text{P}$ NMR spectrum of <b>3</b> in $\text{CDCl}_3$         | 5  |
| <b>Figure S9.</b>  | Mass spectrum of <b>3</b>                                           | 5  |
| <b>Figure S10.</b> | $^1\text{H}$ NMR spectrum of <b>4</b> in $\text{CDCl}_3$            | 6  |
| <b>Figure S11.</b> | $^{13}\text{C}$ NMR spectrum of <b>4</b> in $\text{CDCl}_3$         | 6  |
| <b>Figure S12.</b> | $^{31}\text{P}$ NMR spectrum of <b>4</b> in $\text{CDCl}_3$         | 7  |
| <b>Figure S13.</b> | HRMS spectrum of <b>4</b>                                           | 7  |
| <b>Figure S14.</b> | UV-vis spectrum of <b>4</b> in $\text{CHCl}_3$                      | 8  |
| <b>Figure S15.</b> | ATR-IR spectrum of <b>4</b>                                         | 8  |
| <b>Figure S16.</b> | $^1\text{H}$ NMR spectrum of <b>7</b> in $\text{DMSO}-d_6$          | 9  |
| <b>Figure S17.</b> | $^{31}\text{P}$ NMR spectrum of <b>7</b> in $\text{DMSO}-d_6$       | 9  |
| <b>Figure S18.</b> | HRMS spectrum of <b>7</b>                                           | 10 |
| <b>Figure S19.</b> | ATR-IR spectrum of <b>7</b>                                         | 10 |
| <b>Figure S20.</b> | $^1\text{H}$ NMR spectrum of <b>5</b> in $\text{CDCl}_3$            | 11 |
| <b>Figure S21.</b> | $^{13}\text{C}$ NMR spectrum of <b>5</b> in $\text{CDCl}_3$         | 11 |
| <b>Figure S22.</b> | $^{31}\text{P}$ NMR spectrum of <b>5</b> in $\text{CDCl}_3$         | 12 |
| <b>Figure S23.</b> | HRMS spectrum of <b>5</b>                                           | 12 |
| <b>Figure S24.</b> | UV-vis spectrum of <b>5</b> in $\text{CHCl}_3$                      | 13 |
| <b>Figure S25.</b> | ATR-IR spectrum of <b>5</b>                                         | 13 |
| <b>Figure S26.</b> | $^1\text{H}$ NMR spectrum of <b>8</b> in $\text{DMSO}-d_6$          | 14 |
| <b>Figure S27.</b> | $^{31}\text{P}$ NMR spectrum of <b>8</b> in $\text{DMSO}-d_6$       | 14 |
| <b>Figure S28.</b> | HRMS spectrum of <b>8</b>                                           | 15 |
| <b>Figure S29.</b> | ATR-IR spectrum of <b>8</b>                                         | 15 |
| <b>Figure S30.</b> | $^1\text{H}$ NMR spectrum of <b>6</b> in $\text{CDCl}_3$            | 16 |
| <b>Figure S31.</b> | $^{13}\text{C}$ NMR spectrum of <b>6</b> in $\text{CDCl}_3$         | 16 |
| <b>Figure S32.</b> | $^{31}\text{P}$ NMR spectrum of <b>6</b> in $\text{CDCl}_3$         | 17 |
| <b>Figure S33.</b> | HRMS spectrum of <b>6</b>                                           | 17 |
| <b>Figure S34.</b> | UV-vis spectrum of <b>6</b> in $\text{CHCl}_3$                      | 18 |
| <b>Figure S35.</b> | ATR-IR spectrum of <b>6</b>                                         | 18 |
| <b>Figure S36.</b> | $^1\text{H}$ NMR spectrum of <b>9</b> in $\text{DMSO}-d_6$          | 19 |
| <b>Figure S37.</b> | $^{31}\text{P}$ NMR spectrum of <b>9</b> in $\text{DMSO}-d_6$       | 19 |
| <b>Figure S38.</b> | HRMS spectrum of <b>9</b>                                           | 20 |
| <b>Figure S39.</b> | ATR-IR spectrum of <b>9</b>                                         | 20 |

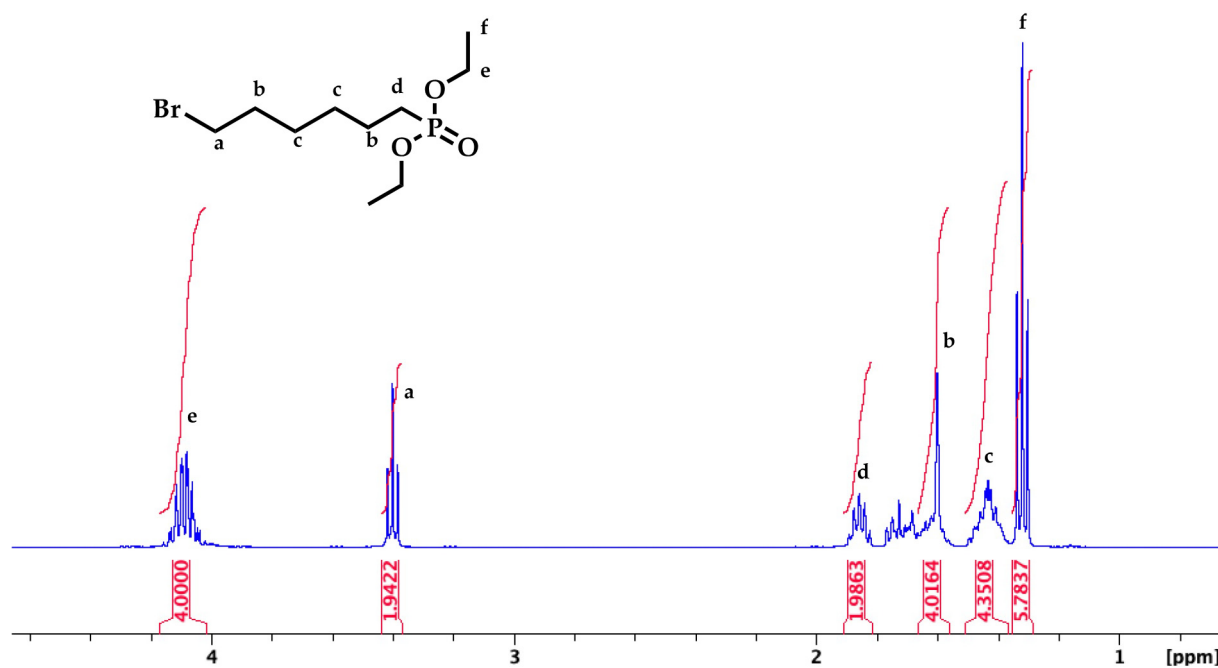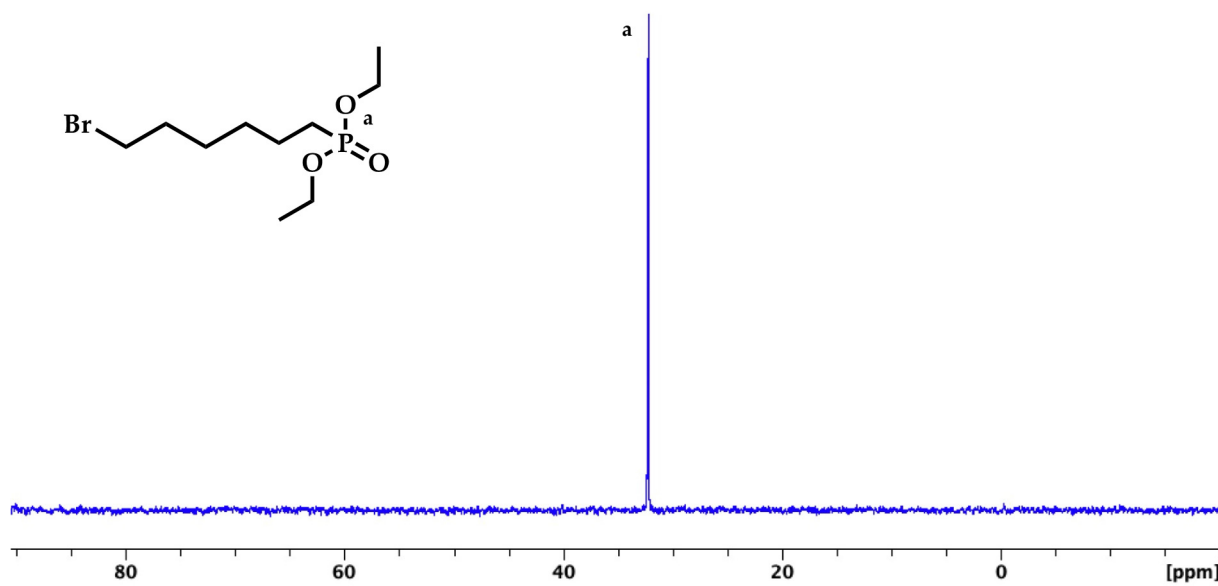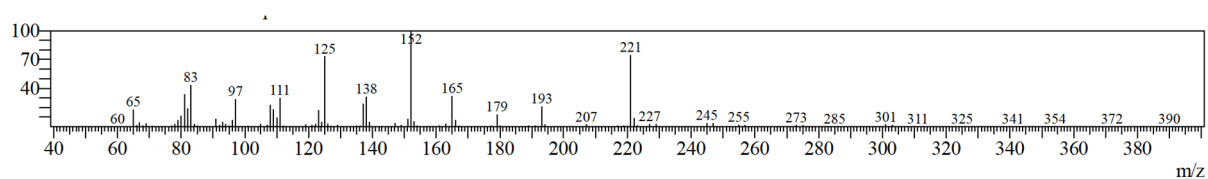

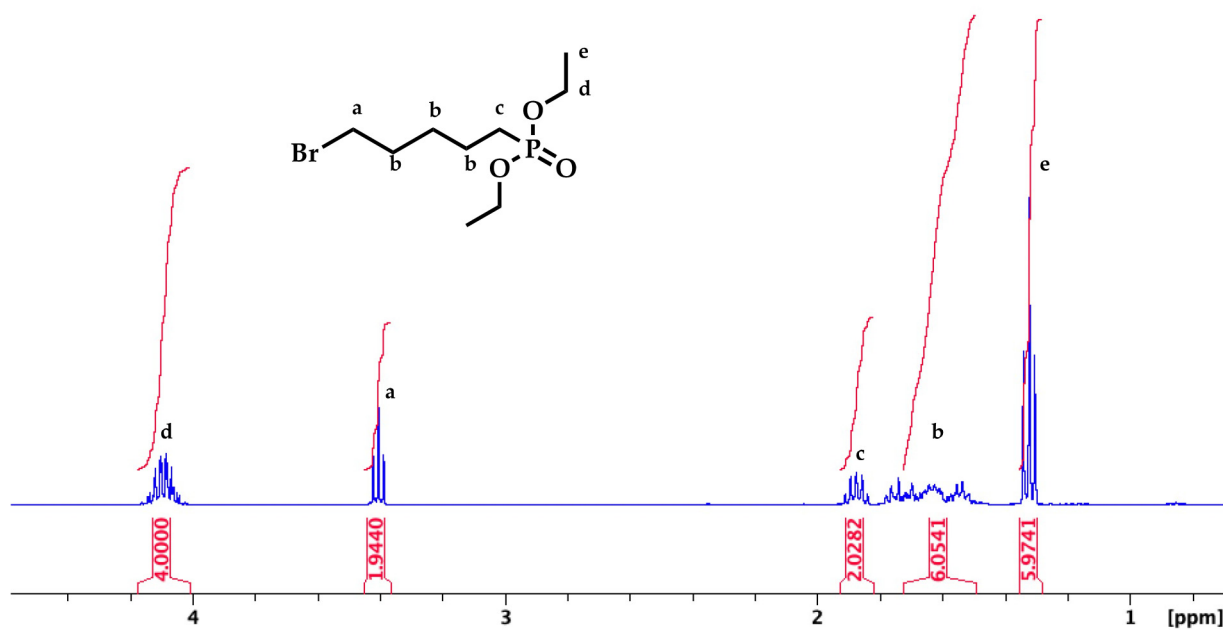

**Figure S4.** <sup>1</sup>H NMR spectrum of **2** in CDCl<sub>3</sub>. <sup>1</sup>H NMR: δ 1.322 (t, J=7.06, 6H), δ 1.475-1.739 (m, 6H), δ 1.826-1.920 (m, 2H), δ 3.404 (t, J=6.72 Hz, 2H), δ 4.013-4.166 (m, 4H).

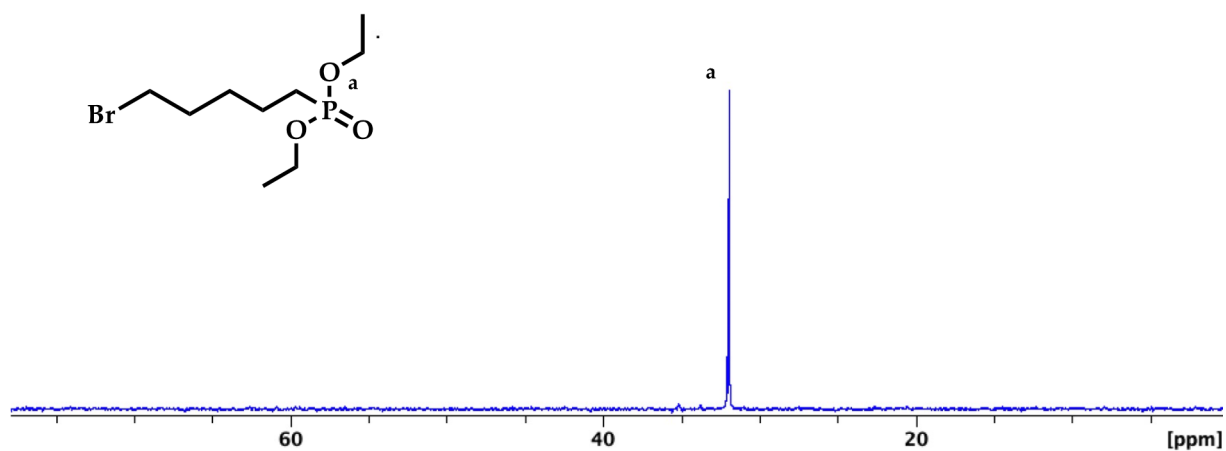

**Figure S5.** <sup>31</sup>P NMR spectrum of **2** in CDCl<sub>3</sub>. <sup>31</sup>P NMR: δ 31.928 (s, 1P).

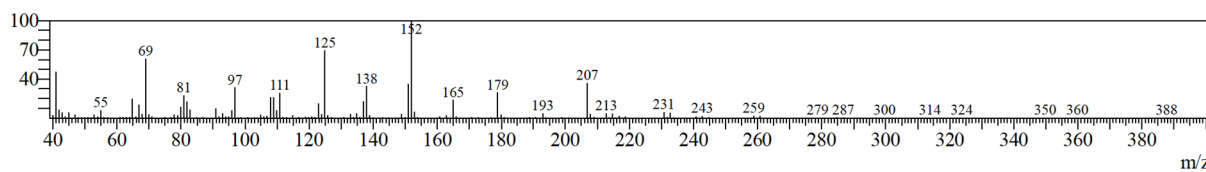

**Figure S6.** Mass spectrum of **2** (EI, 70 eV):  $m/z = 207$  [M-Br]<sup>+</sup>;  $m/z = 152$  [<sup>•</sup>CH<sub>2</sub>P(=OH)(OCH<sub>2</sub>CH<sub>3</sub>)<sub>2</sub>]<sup>+</sup>;  $m/z = 125$  [152-C<sub>2</sub>H<sub>5</sub>]<sup>+</sup>.

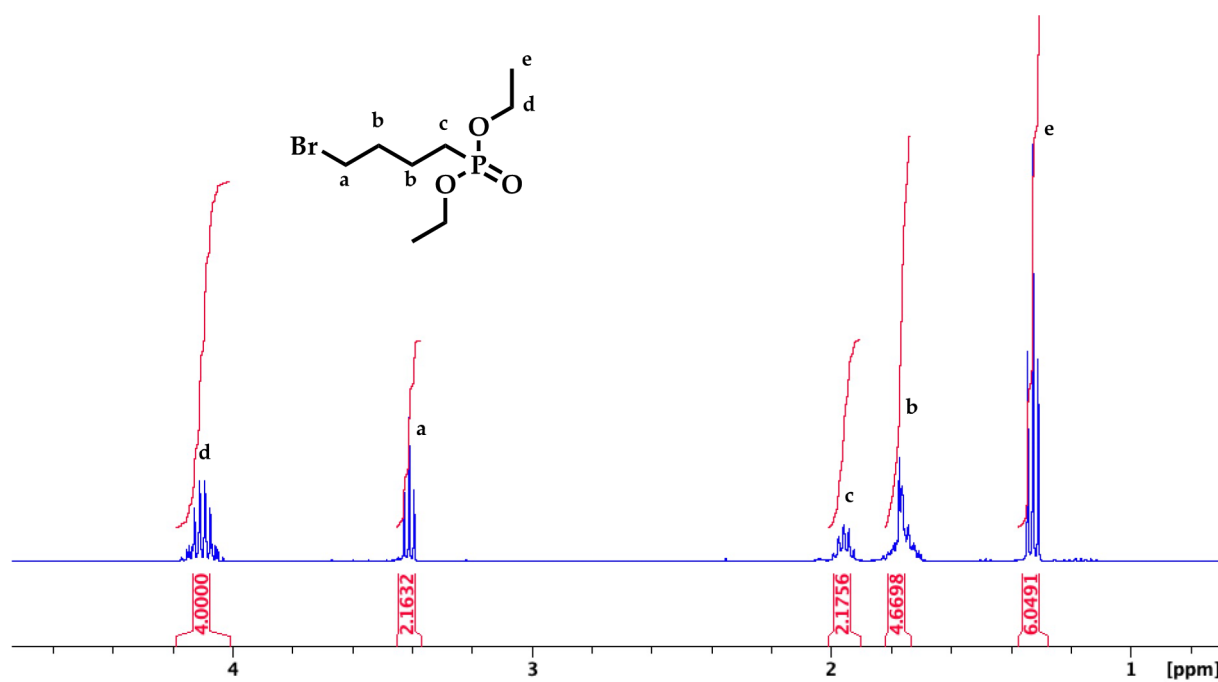

**Figure S7.** <sup>1</sup>H NMR spectrum of 3 in CDCl<sub>3</sub>. <sup>1</sup>H NMR: δ 1.326 (t, J=7.05, 6H), δ 1.730-1.821 (m, 4H), δ 1.918-2.002 (m, 2H), δ 3.409 (t, J=6.56 Hz, 2H), δ 4.042-4.156 (m, 4H).

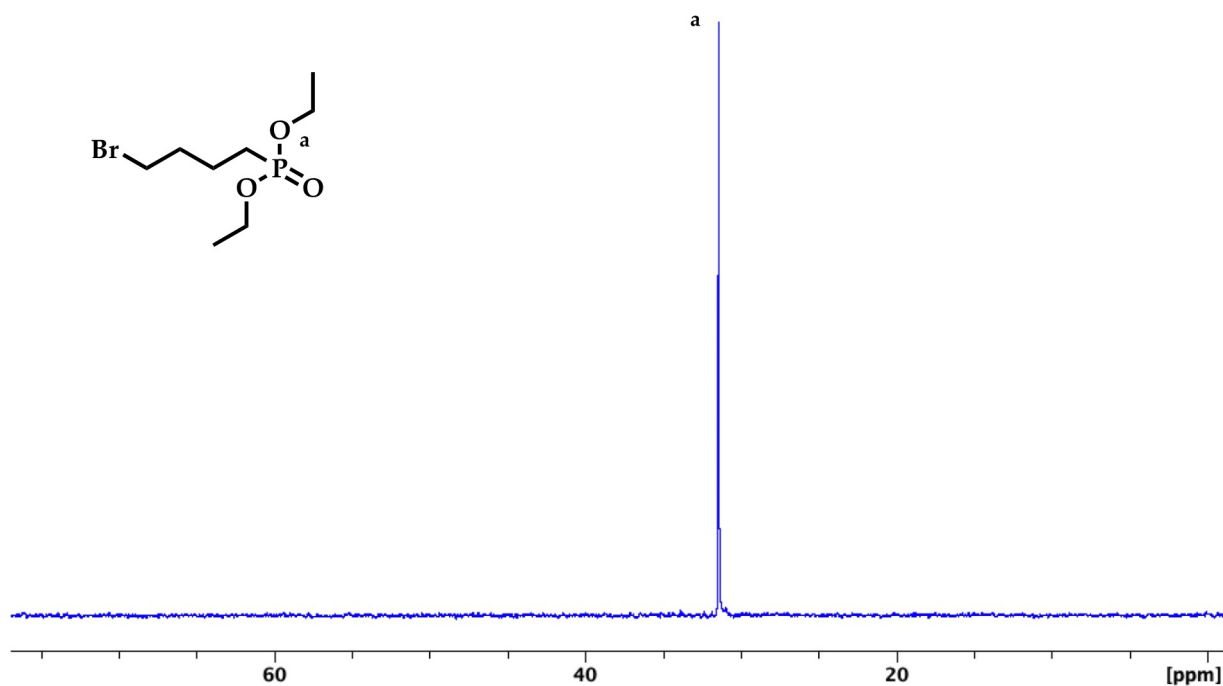

**Figure S8.** <sup>31</sup>P NMR spectrum of 3 in CDCl<sub>3</sub>. <sup>31</sup>P NMR: δ 31.400 (s, 1P).

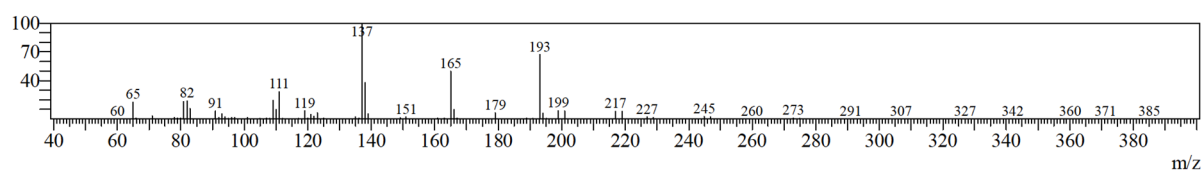

**Figure S9.** Mass spectrum of 3 MS (EI, 70 eV):  $m/z = 193$  [M-Br]<sup>+</sup>;  $m/z = 165$  [193-C<sub>2</sub>H<sub>4</sub>]<sup>+</sup>;  $m/z = 137$  [165-C<sub>2</sub>H<sub>4</sub>]<sup>+</sup>.

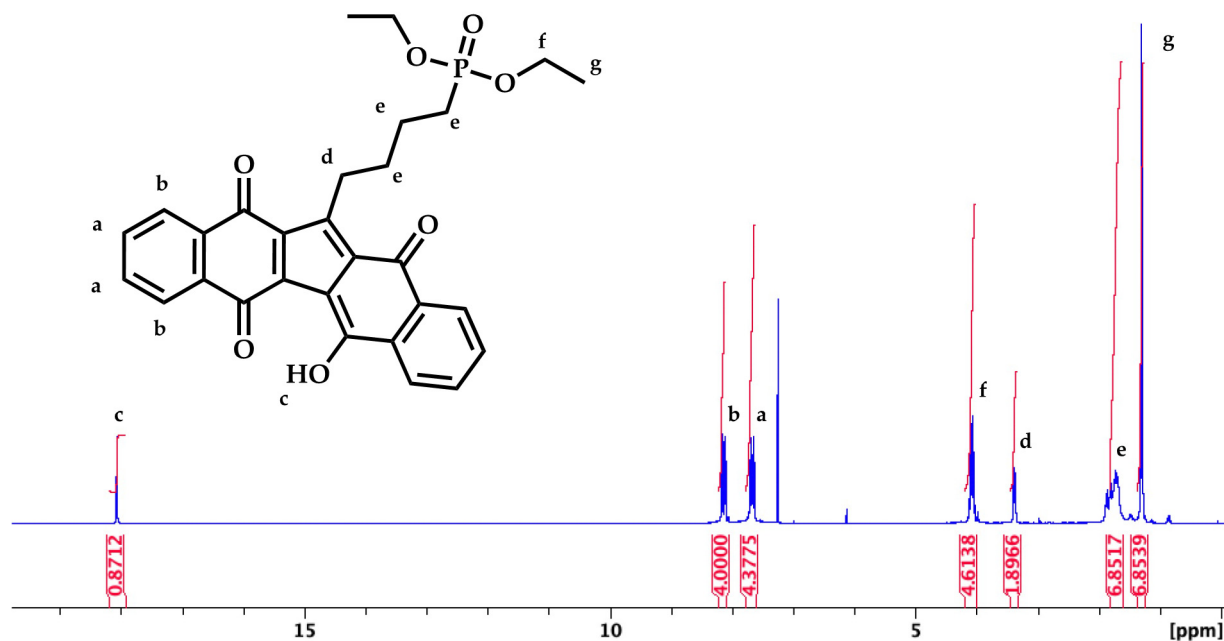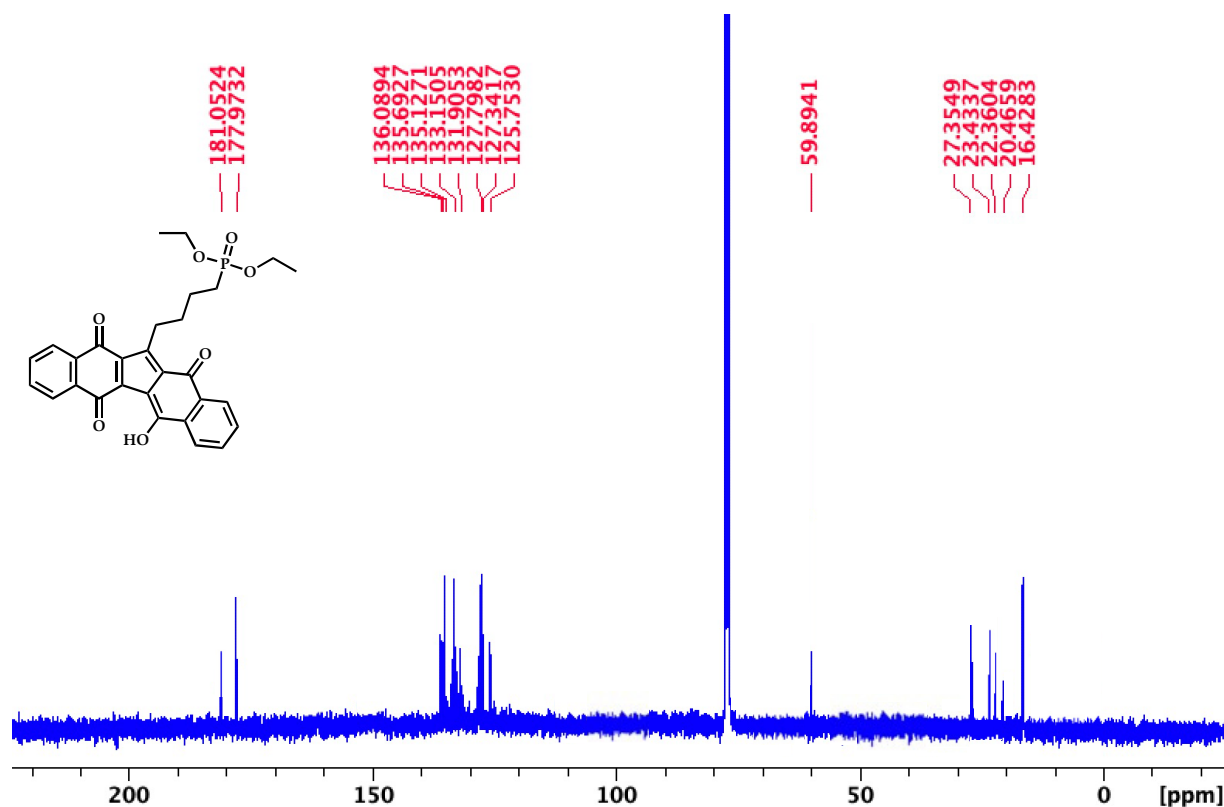

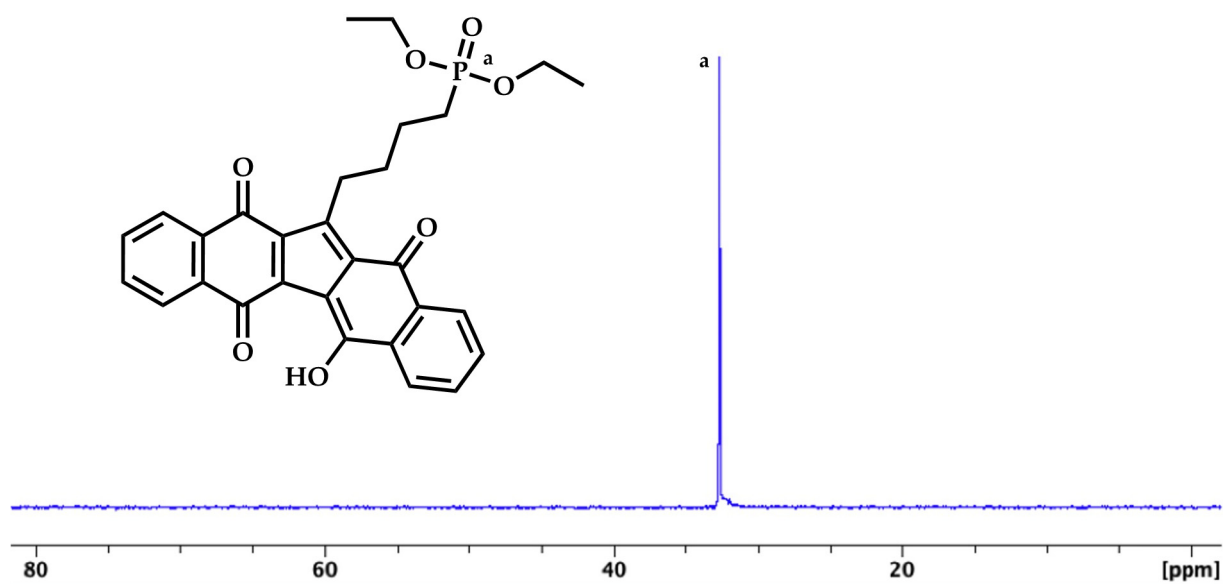

**Figure S12.** <sup>31</sup>P NMR spectrum of **4** in CDCl<sub>3</sub>. <sup>31</sup>P NMR: δ 32.686 (s, 1P).

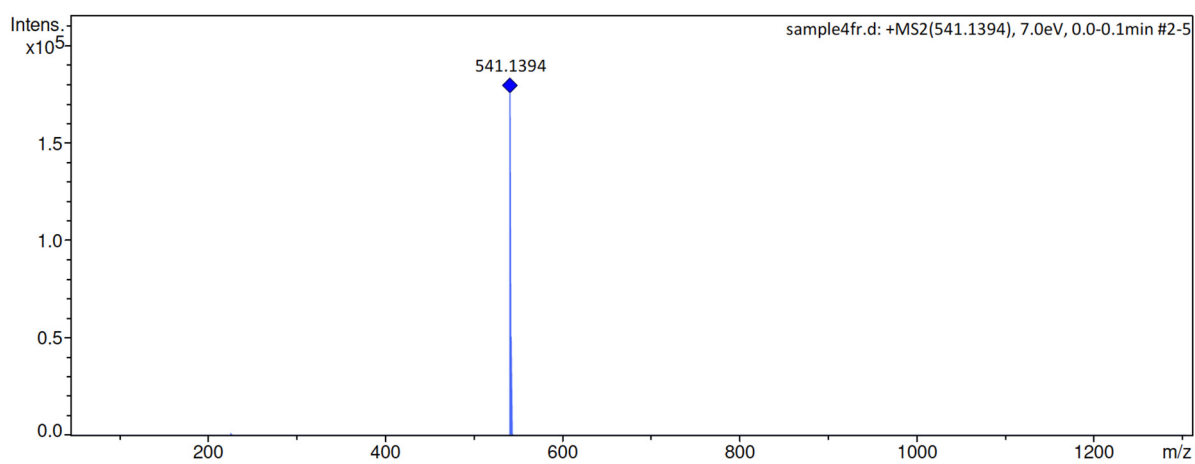

**Figure S13.** HRMS spectrum of **4**. *m/z*: [M + Na]<sup>+</sup> calcd for C<sub>29</sub>H<sub>27</sub>NaO<sub>7</sub>P 541.1387; found 541.1394.

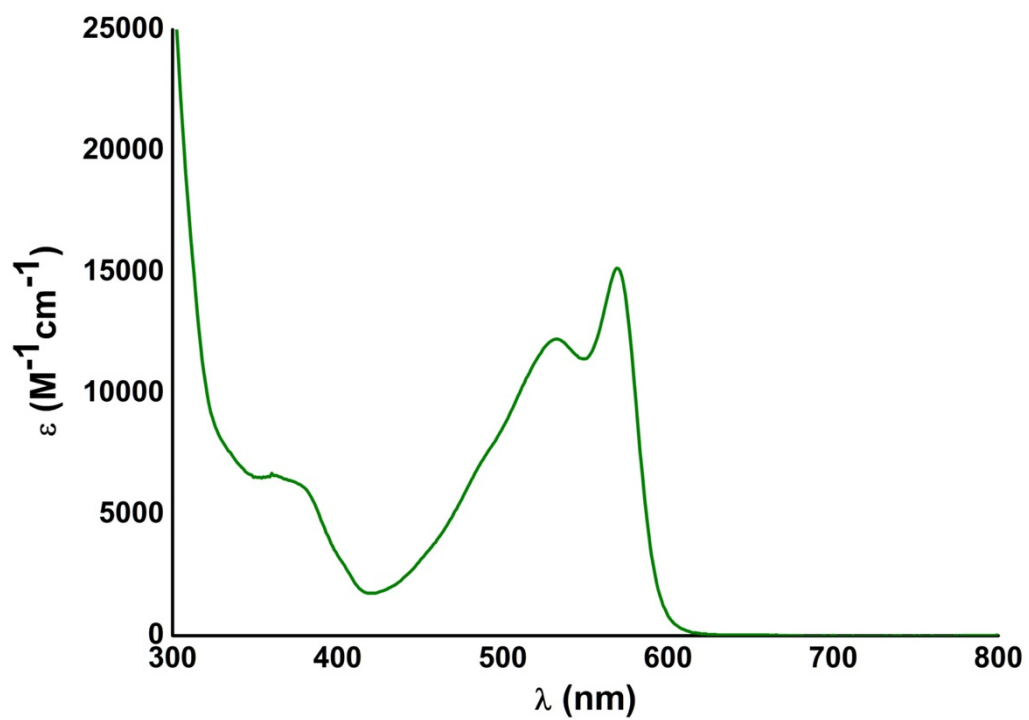

Figure S14. UV-vis spectrum of 4 in CHCl<sub>3</sub>.

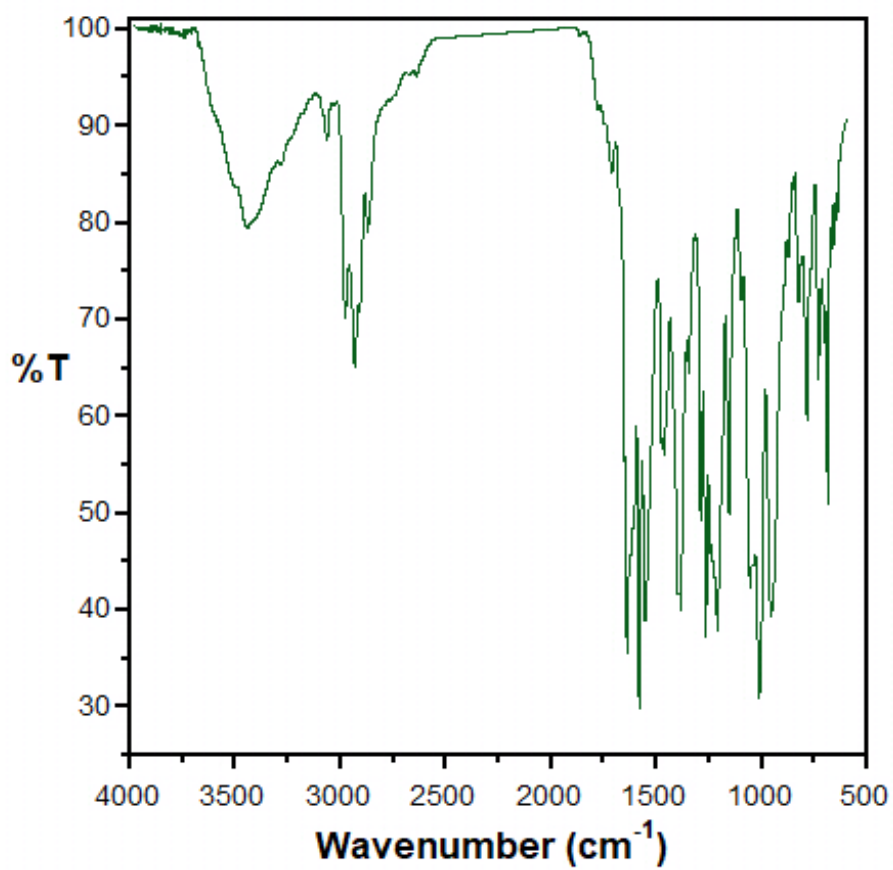

Figure S15. ATR-IR spectrum of 4.



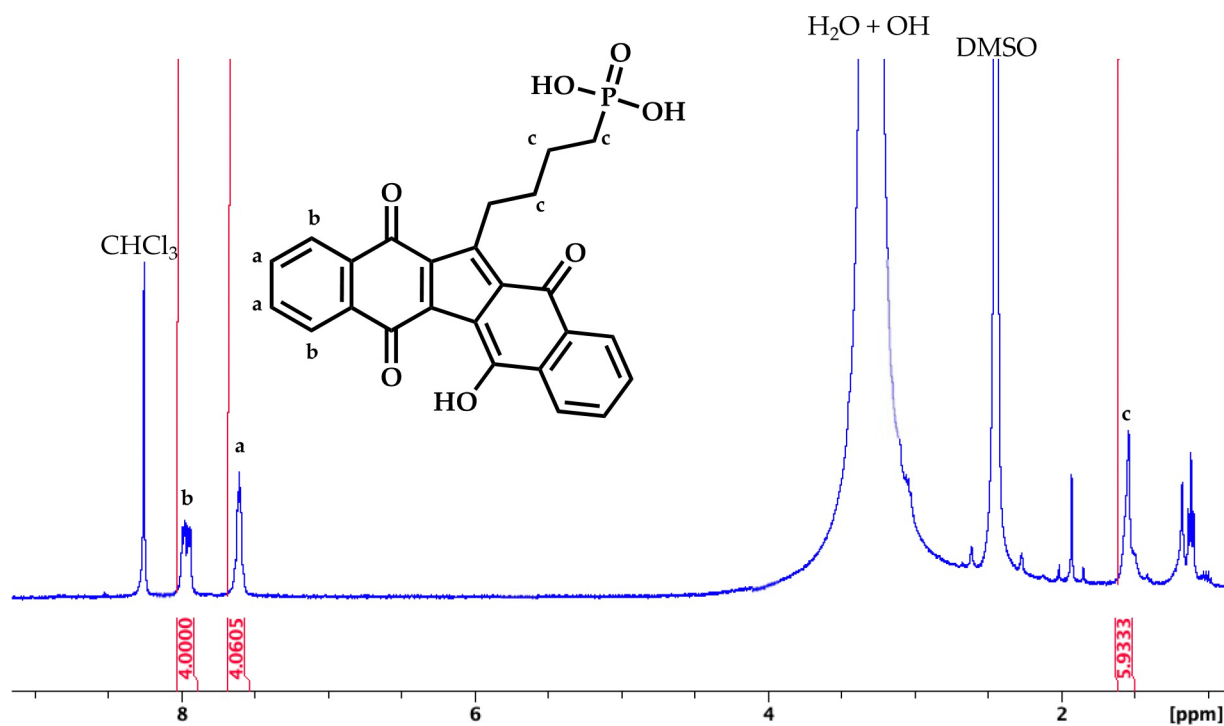

**Figure S16.**  $^1\text{H}$  NMR spectrum of 7 in  $\text{DMSO}-d_6$ .  $^1\text{H}$  NMR:  $\delta$  1.493-1.617 (m, 6H),  $\delta$  7.529-7.697 (m, 4H),  $\delta$  7.891-8.035 (m, 4H).

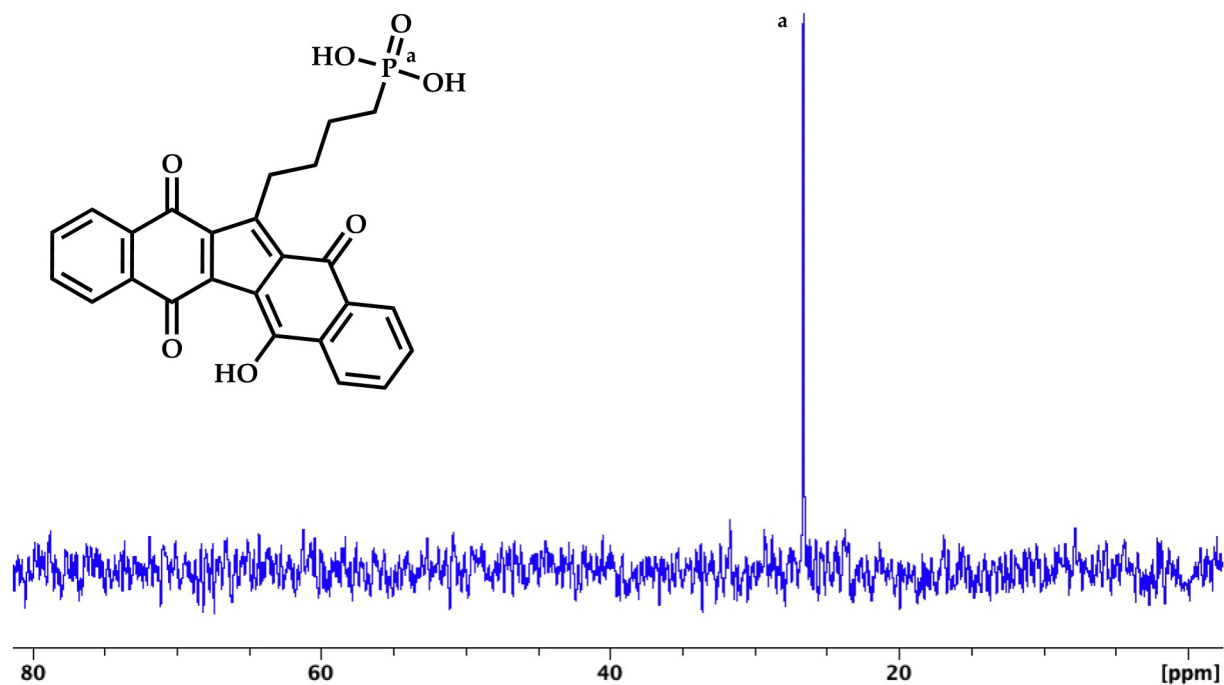

**Figure S17.**  $^{31}\text{P}$  NMR spectrum of 7 in  $\text{DMSO}-d_6$ ;  $\delta$  26.653 (s, 1P).

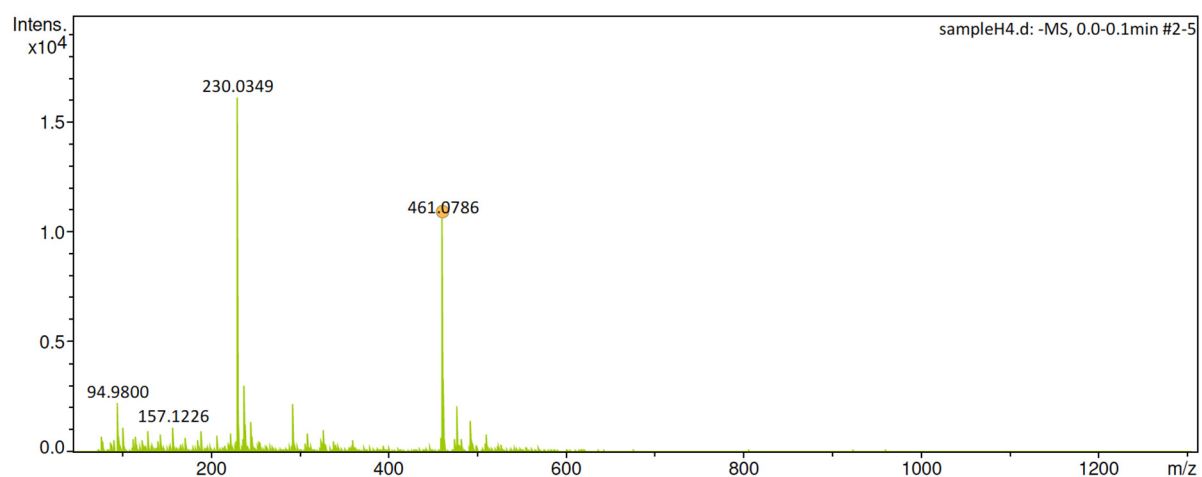

**Figure S18.** HRMS spectrum of 7.  $m/z$ :  $[M - H]^-$  calcd for  $C_{25}H_{18}O_7P$  461.0796; found 461.0786.

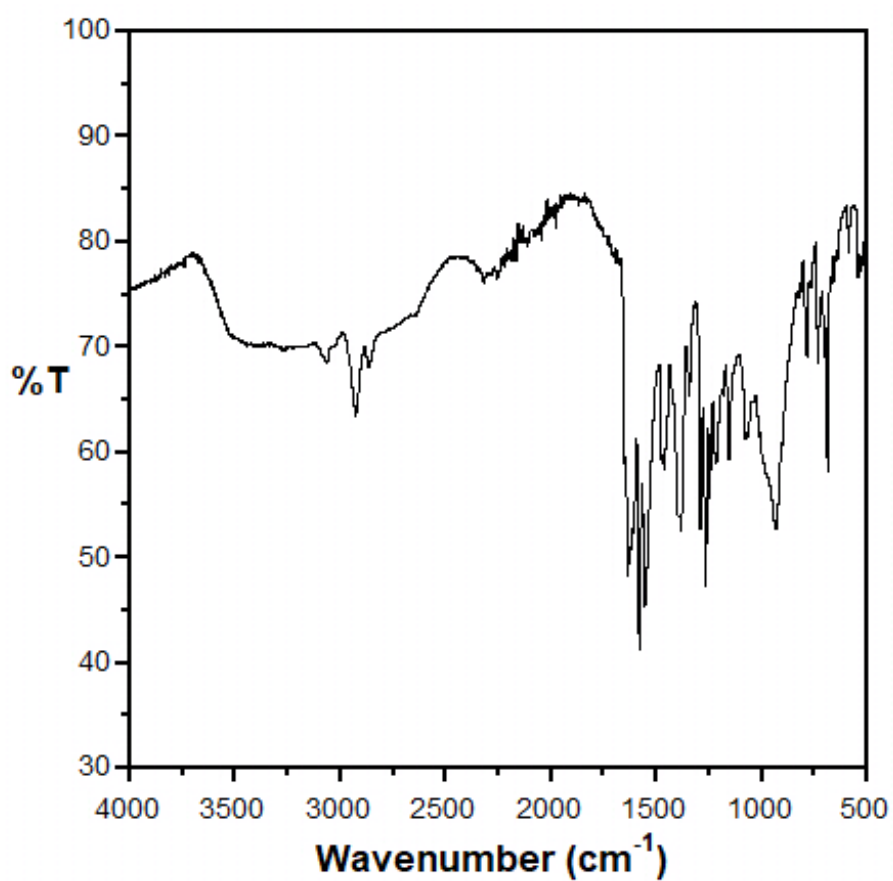

**Figure S19.** ATR-IR spectrum of 7.

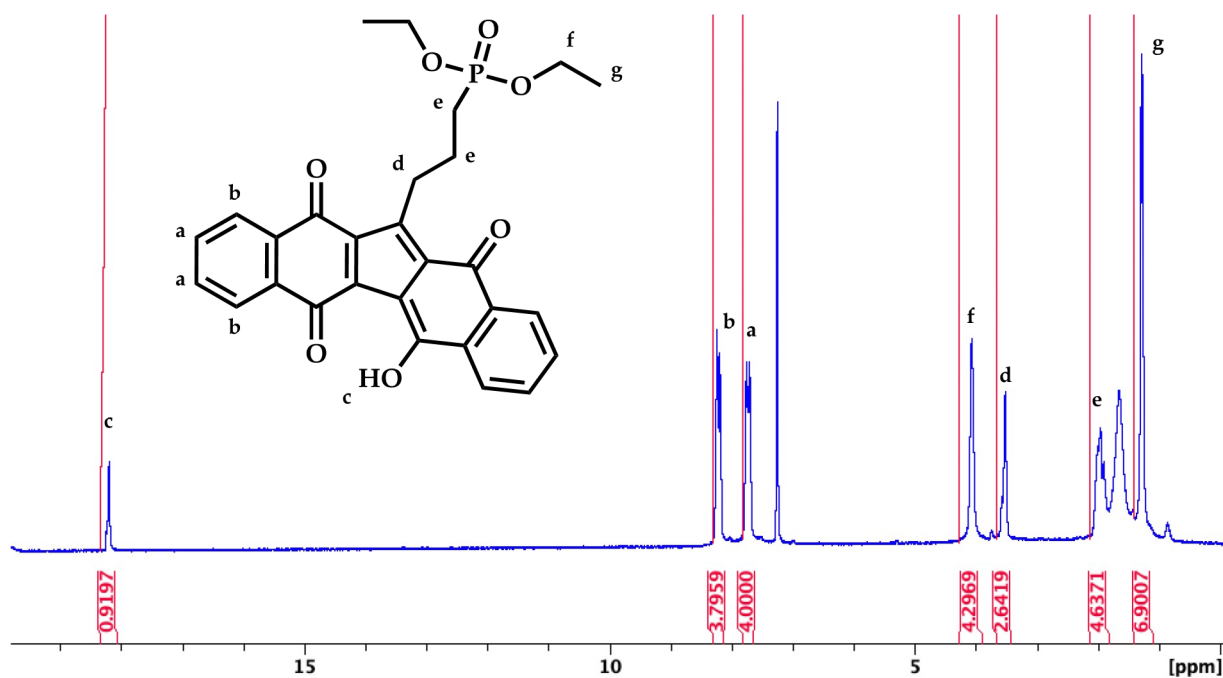

**Figure S20.**  $^1\text{H}$  NMR spectrum of **5** in  $\text{CDCl}_3$ .  $^1\text{H}$  NMR:  $\delta$  1.281 (t,  $J=7.08$  Hz, 6H),  $\delta$  1.862-2.053 (m, 4H),  $\delta$  3.486 (t,  $J=7.09$ , 2H),  $\delta$  3.991-4.152 (m, 4H),  $\delta$  7.628-7.780 (m, 4H),  $\delta$  8.120-8.238 (m, 4H),  $\delta$  18.150 (s, 1H).

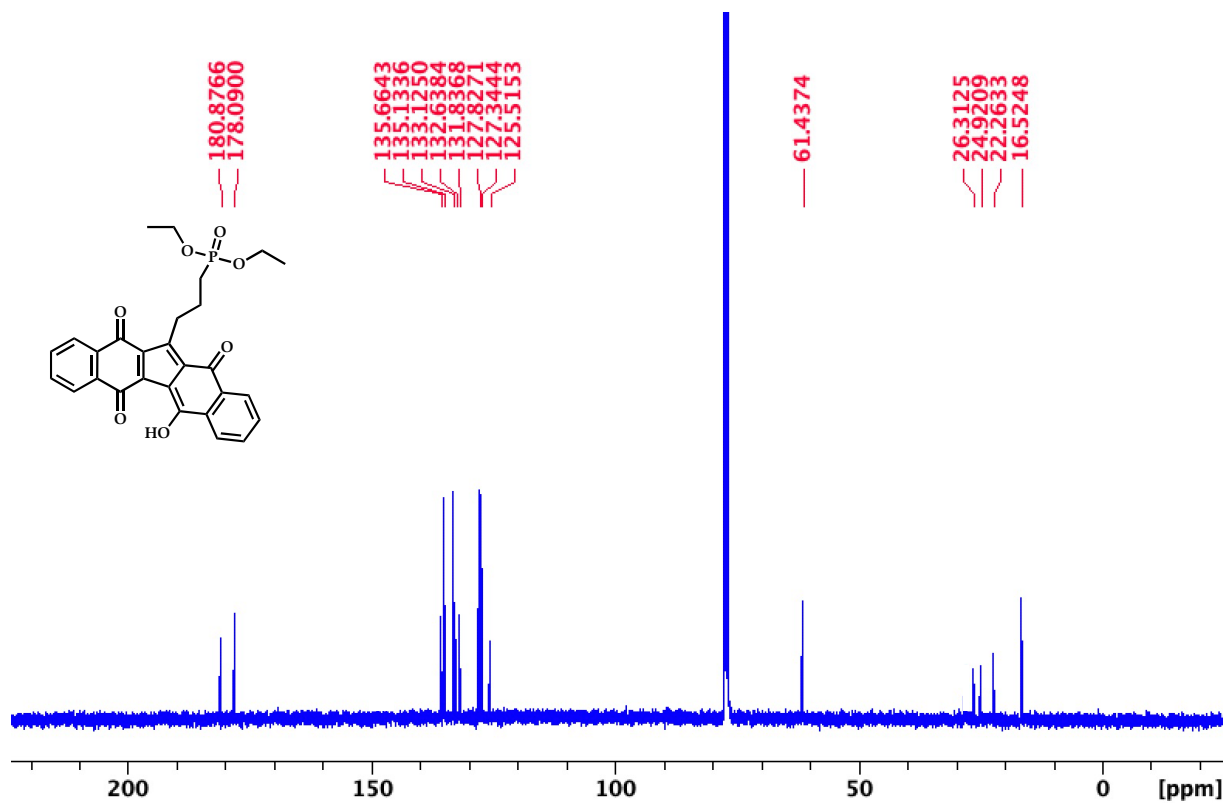

**Figure S21.**  $^{13}\text{C}$  NMR spectrum of **5** in  $\text{CDCl}_3$ .  $^{13}\text{C}$  NMR:  $\delta$  180.876 and 178.090 (C=O);  $\delta$  135.664, 135.133, 133.125, 132.638, 131.836, 127.827, 127.344, 125.515 (aromatic carbons);  $\delta$  61.437, 26.312, 24.920, 22.263, 16.524 (aliphatic carbons).

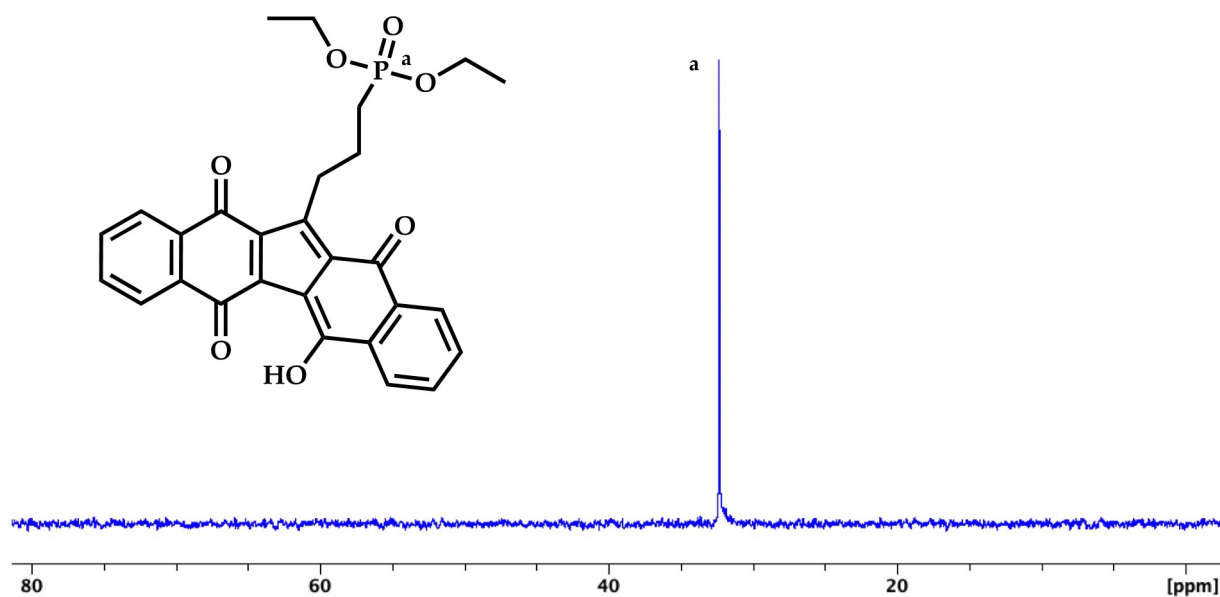

**Figure S22.** <sup>31</sup>P NMR spectrum of 5 in CDCl<sub>3</sub>. <sup>31</sup>P NMR: δ 32.337 (s, 1P).

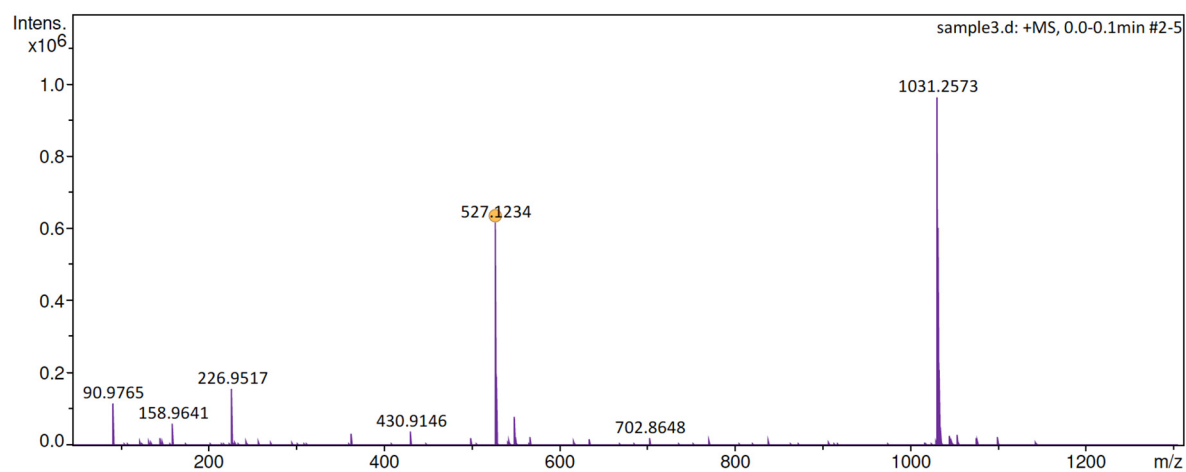

**Figure S23.** HRMS spectrum of 5. *m/z*: [M + Na]<sup>+</sup> calcd for C<sub>28</sub>H<sub>25</sub>NaO<sub>7</sub>P 527.1230; found 527.1234.

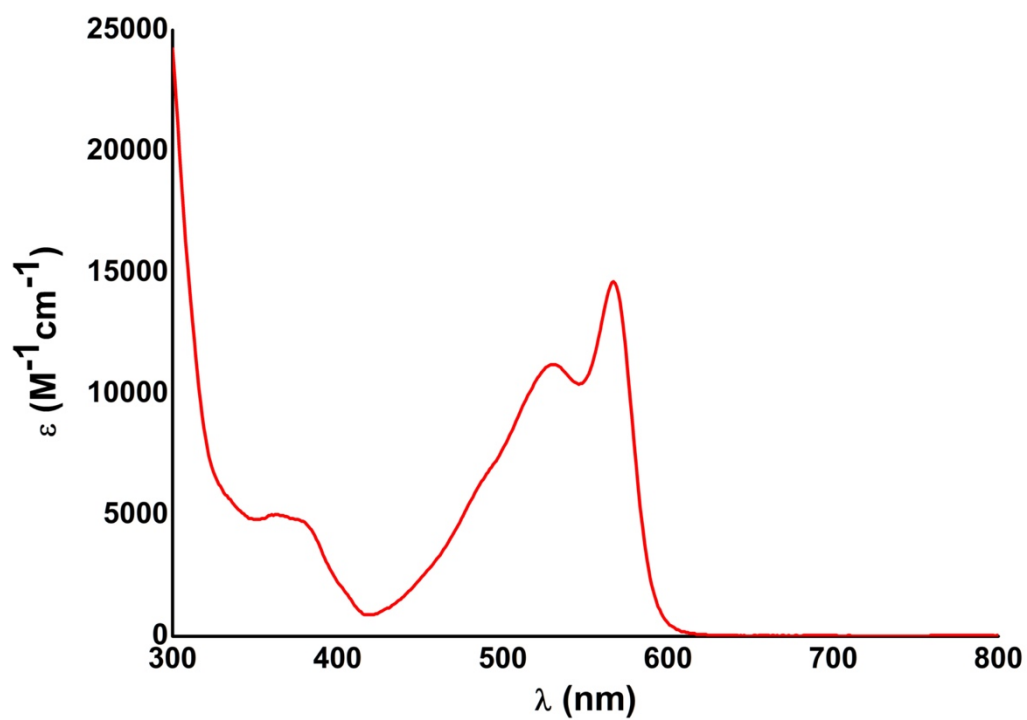

Figure S24. UV-vis spectrum of 5 in CHCl<sub>3</sub>.

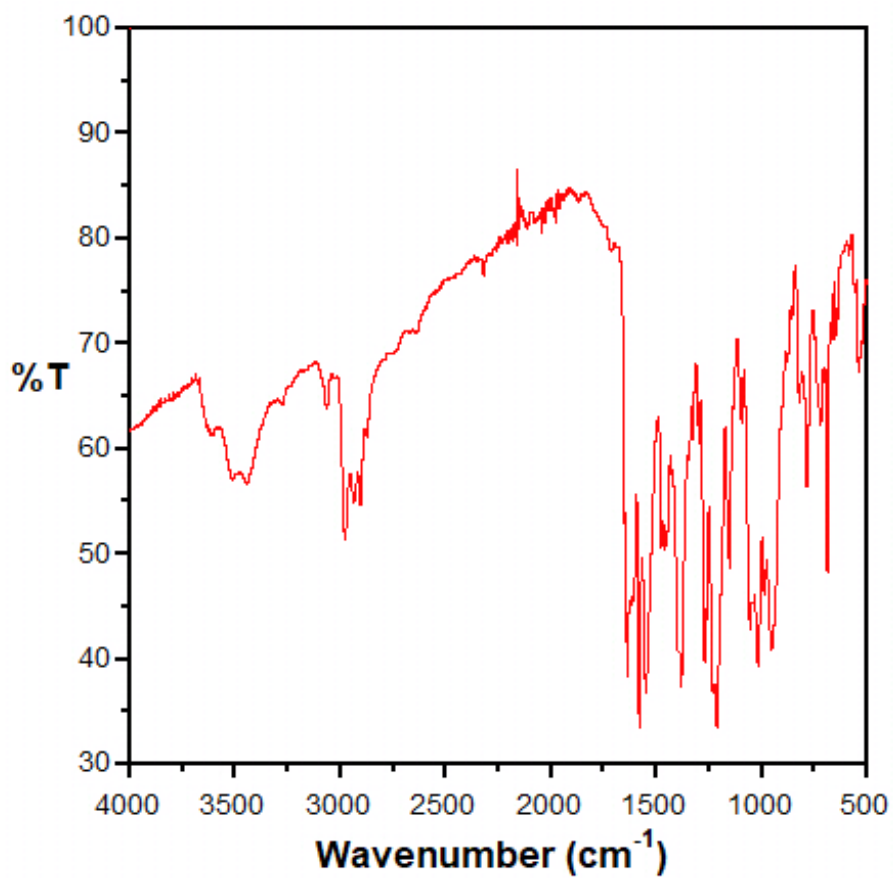

Figure S25. ATR-IR spectrum of 5.

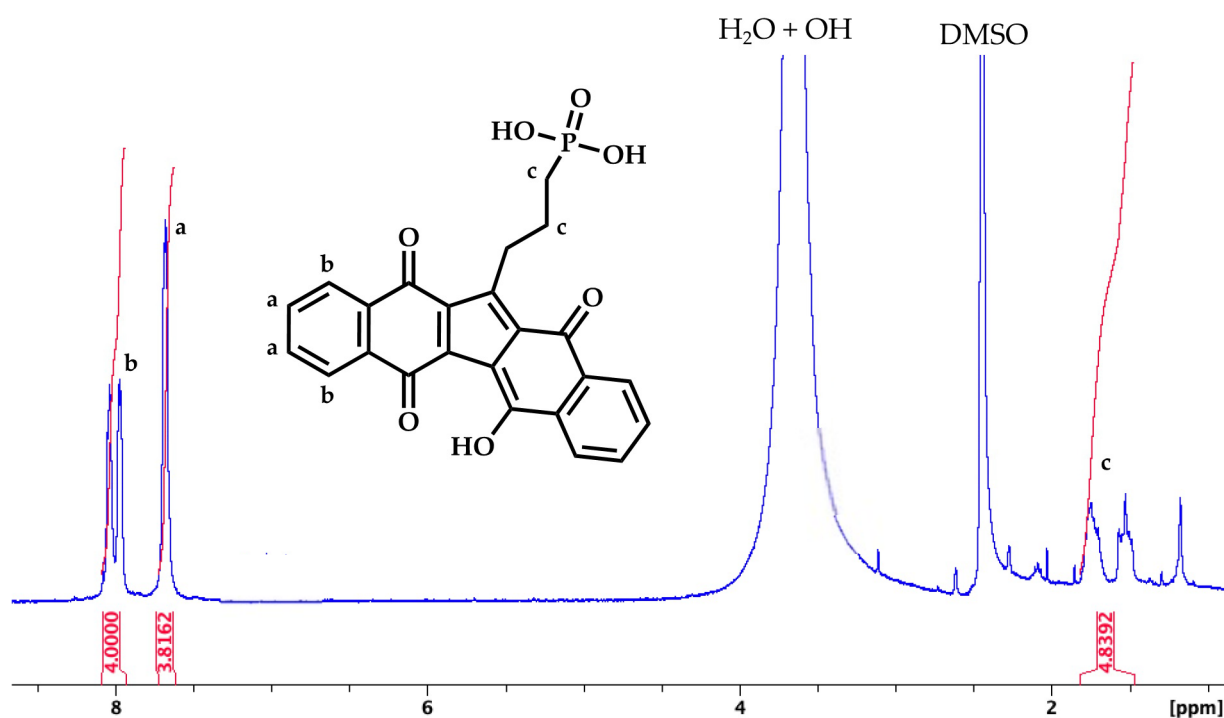

**Figure S26.**  $^1\text{H}$  NMR spectrum of 8 in  $\text{DMSO-d}_6$ .  $^1\text{H}$  NMR:  $\delta$  1.493-1.801 (m, 4H),  $\delta$  7.609-7.725 (m, 4H),  $\delta$  7.924-8.084 (m, 4H).

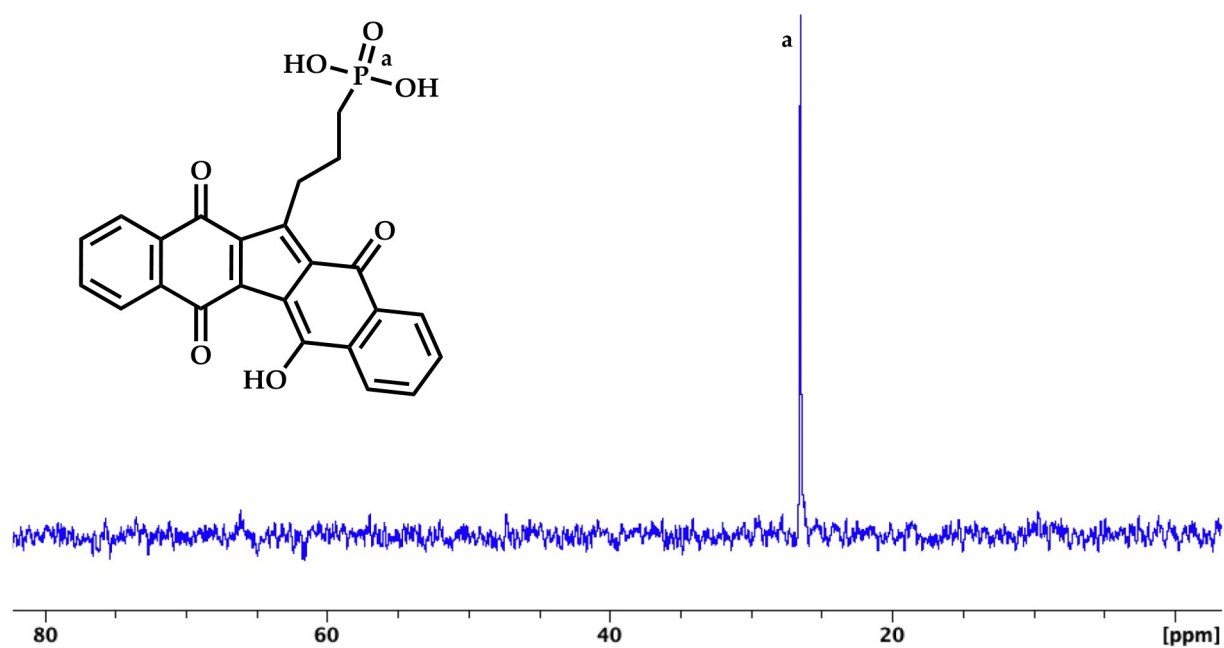

**Figure S27.**  $^{31}\text{P}$  NMR spectrum of 8 in  $\text{DMSO-d}_6$ :  $\delta$  26.534 (s, 1P).

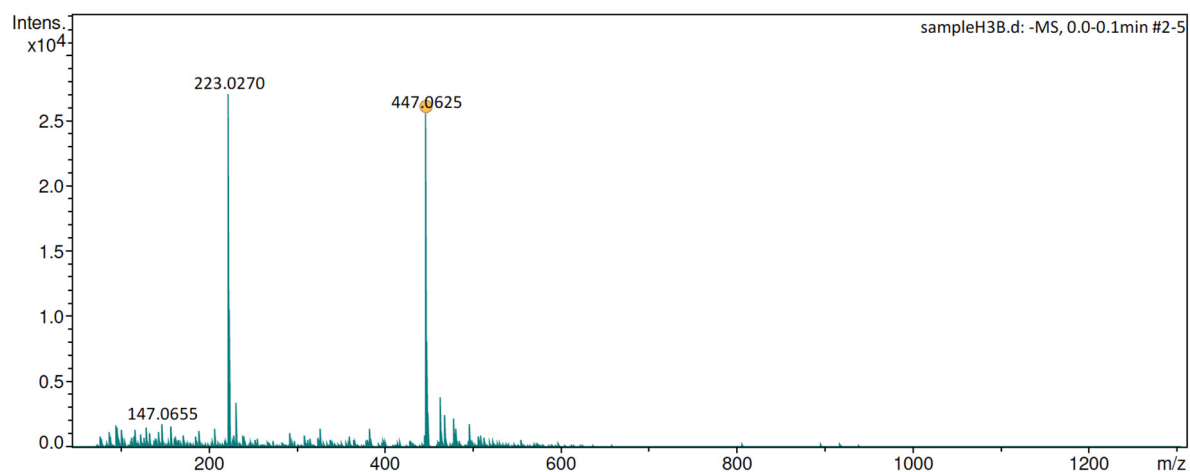

**Figure S28.** HRMS spectrum of 8.  $m/z$ :  $[M - H]^-$  calcd for  $C_{24}H_{16}O_7P$  447.0639; found 447.0625.

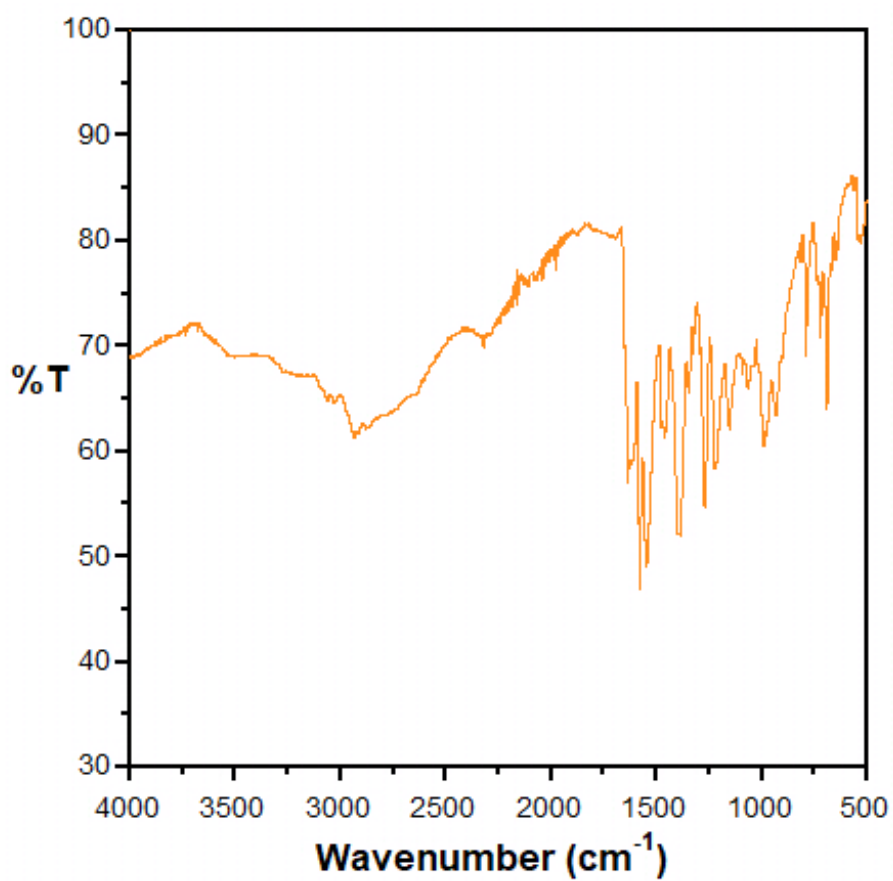

**Figure S29.** ATR-IR spectrum of 8.

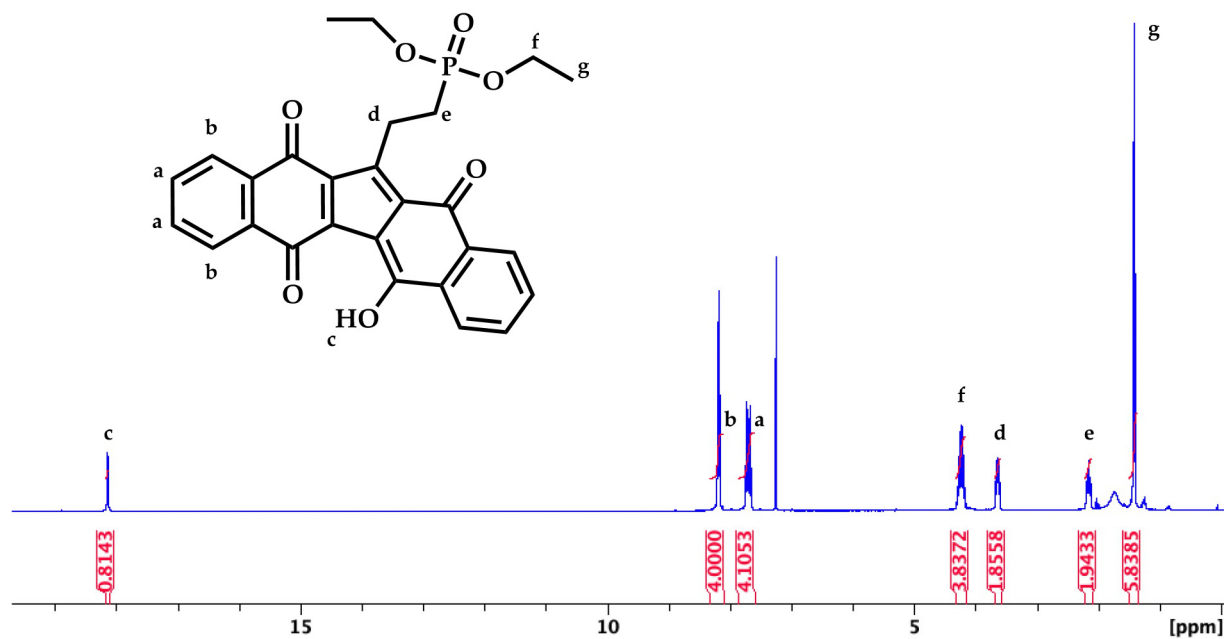

**Figure S30.**  $^1\text{H}$  NMR spectrum of **6** in  $\text{CDCl}_3$ .  $^1\text{H}$  NMR:  $\delta$  1.423 (t,  $J=7.00$  Hz, 6H),  $\delta$  2.102-2.224 (m, 2H),  $\delta$  3.602-3.702 (m, 2H),  $\delta$  4.157-4.320 (m, 4H),  $\delta$  7.645-7.764 (m, 4H),  $\delta$  8.163-8.228 (m, 4H),  $\delta$  18.147 (s, 1H).

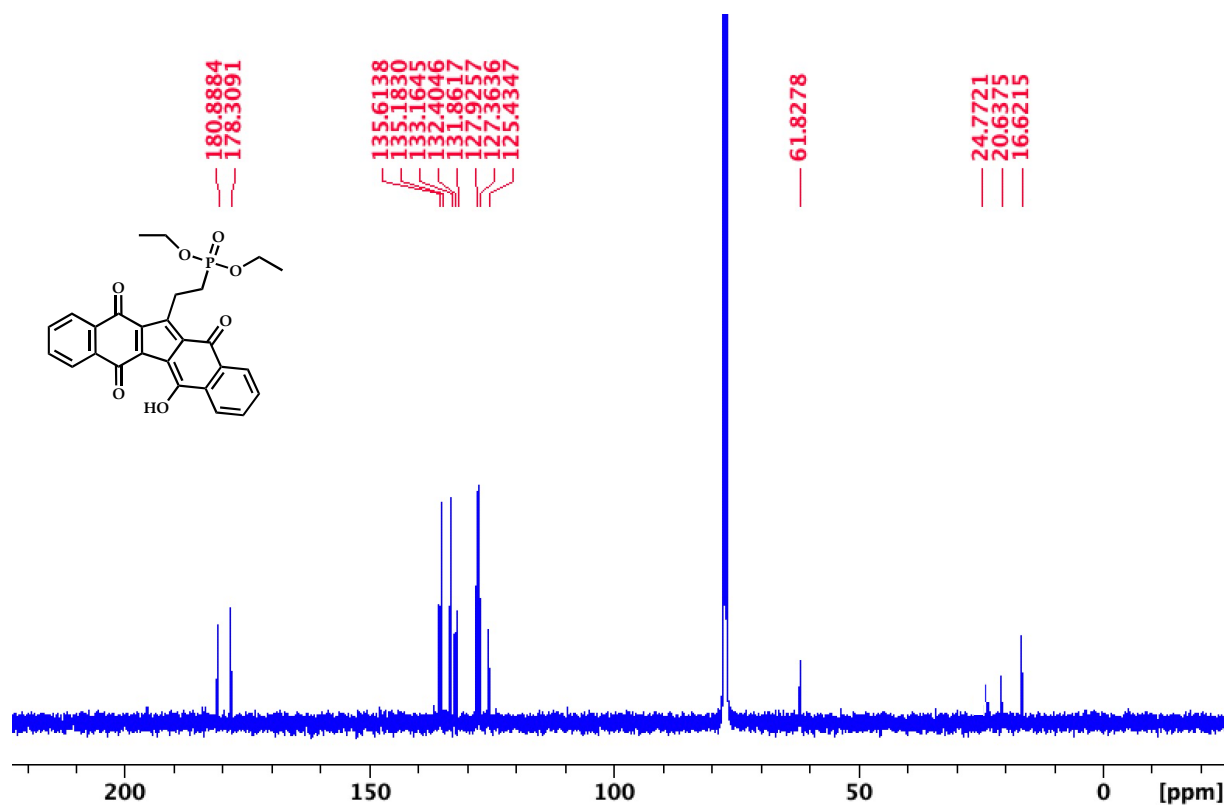

**Figure S31.**  $^{13}\text{C}$  NMR spectrum of **6** in  $\text{CDCl}_3$ .  $^{13}\text{C}$  NMR:  $\delta$  180.888 and 178.309 (C=O);  $\delta$  135.613, 135.183, 133.164, 132.404, 131.861, 127.925, 127.363, 125.434 (aromatic carbons);  $\delta$  61.827, 24.772, 20.637, 16.621 (aliphatic carbons).



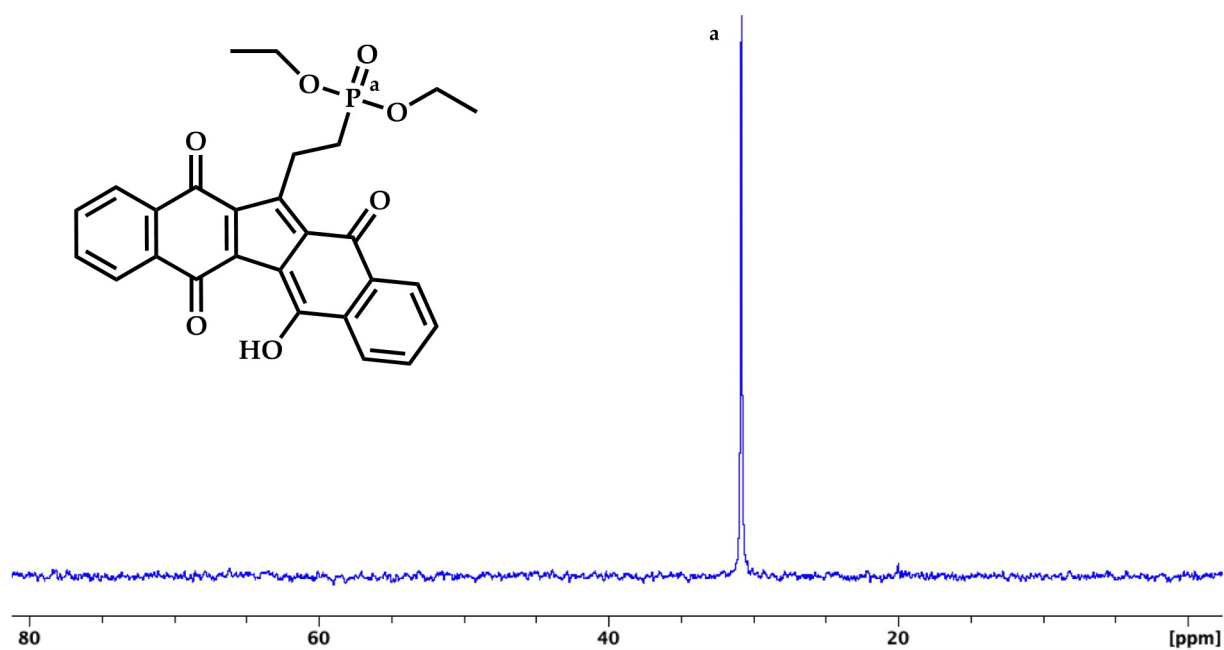

**Figure S32.** <sup>31</sup>P NMR spectrum of **6** in CDCl<sub>3</sub>. <sup>31</sup>P NMR: δ 30.835 (s, 1P).

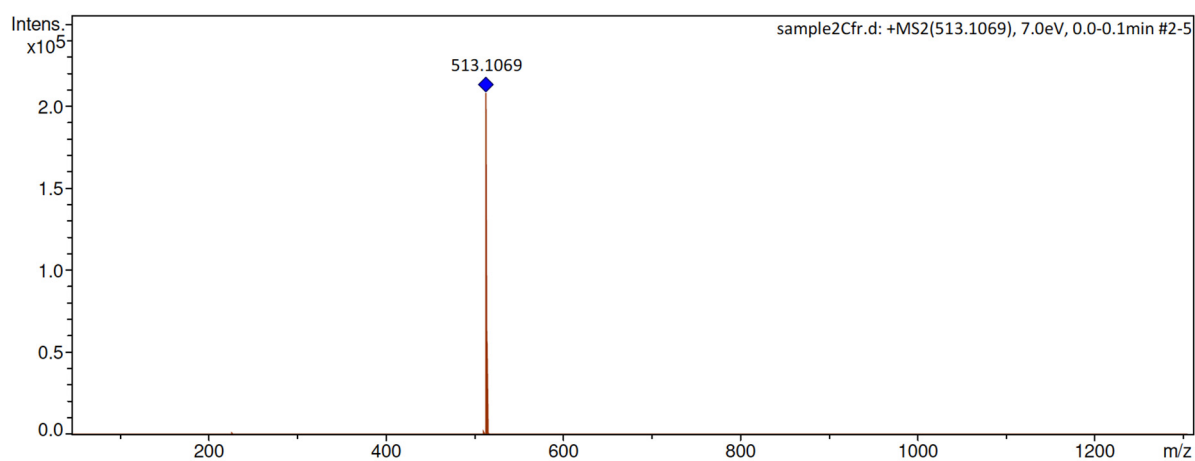

**Figure S33.** HRMS spectrum of **6**. *m/z*: [M + Na]<sup>+</sup> calcd for C<sub>27</sub>H<sub>23</sub>NaO<sub>7</sub>P 513.1074; found 513.1069.

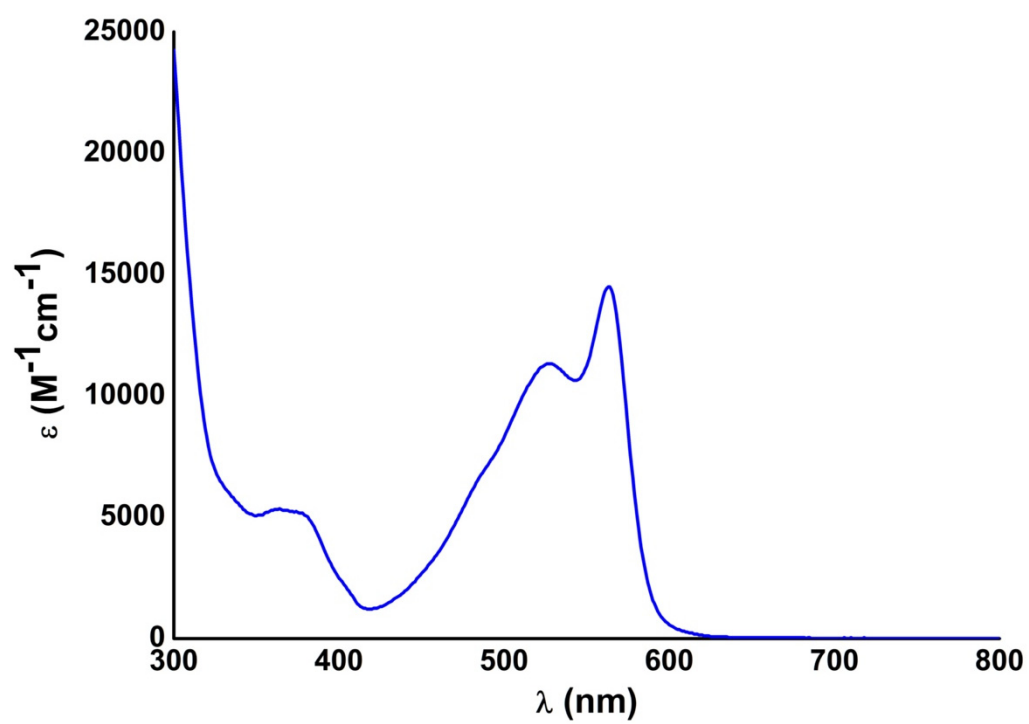

Figure S34. UV-vis spectra of 6 in CHCl<sub>3</sub>.

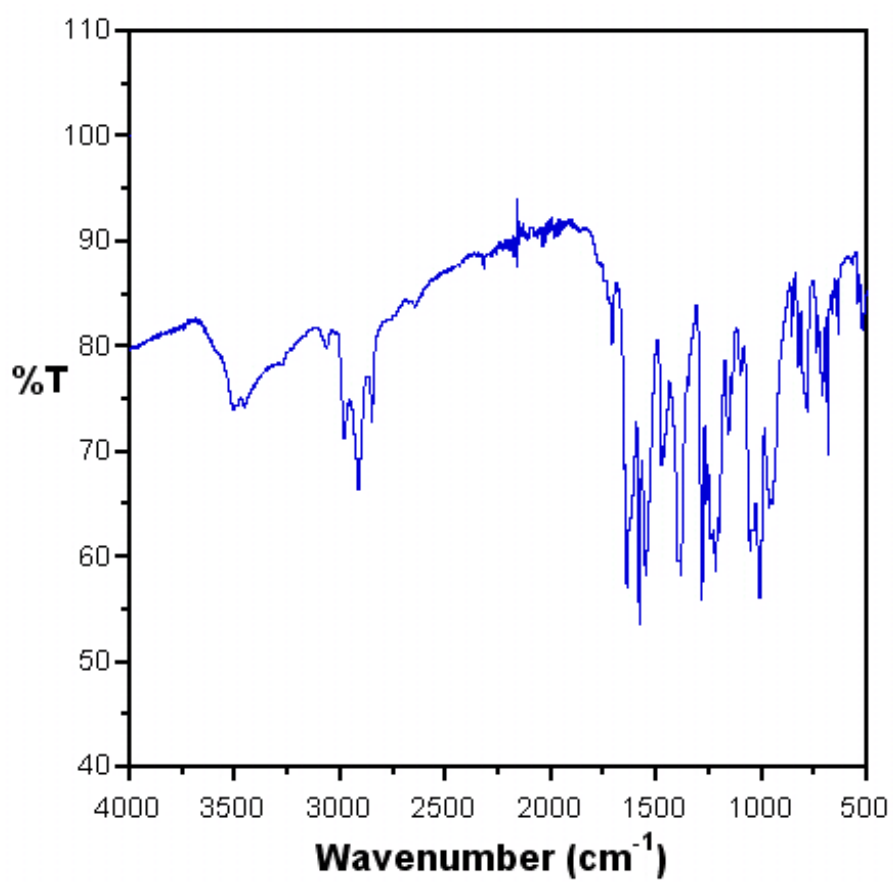

Figure S35. ATR-IR spectrum of 6.

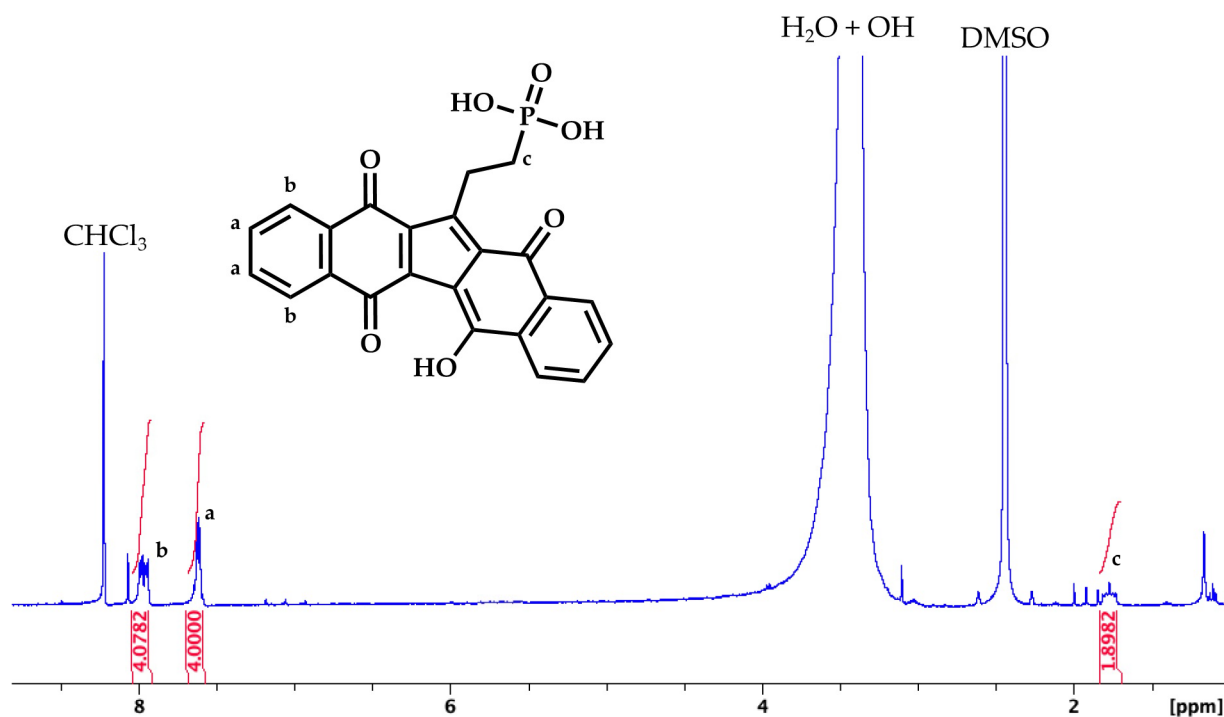

**Figure S36.** <sup>1</sup>H NMR spectrum of 9 in DMSO-d<sub>6</sub>. <sup>1</sup>H NMR: δ 1.692-1.847 (m, 2H), δ 7.509-7.677 (m, 4H), δ 7.921-8.045 (m, 4H).

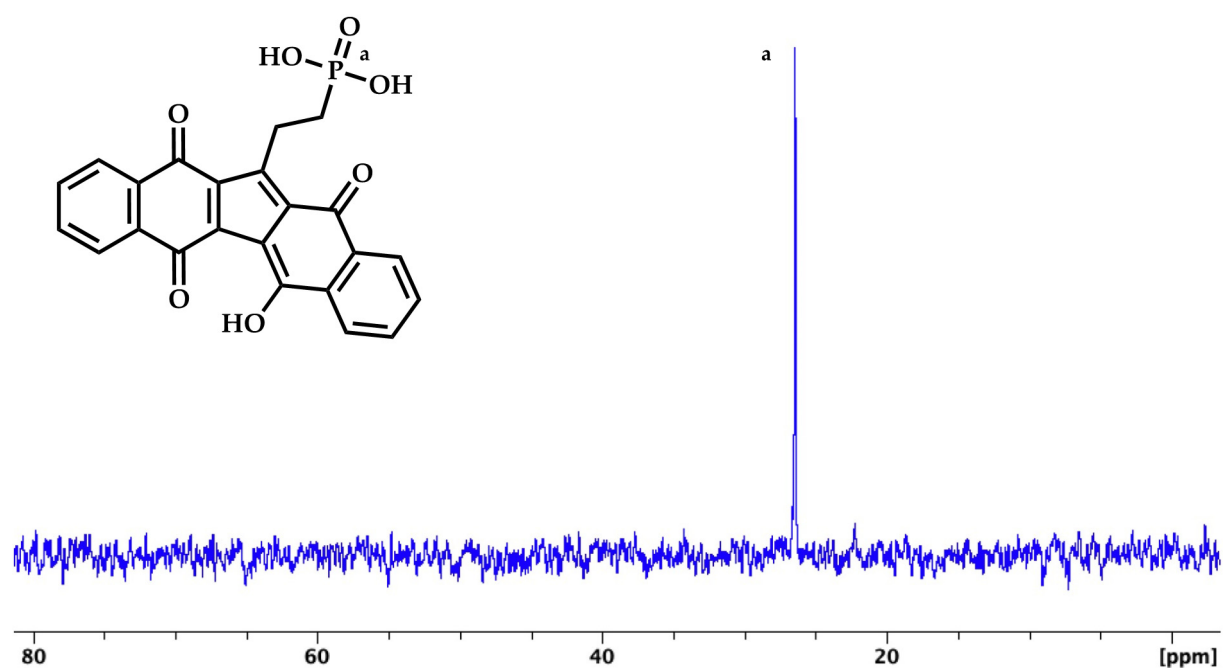

**Figure S37.** <sup>31</sup>P NMR spectrum of 9 in DMSO-d<sub>6</sub>: δ 26.483 (s, 1P).

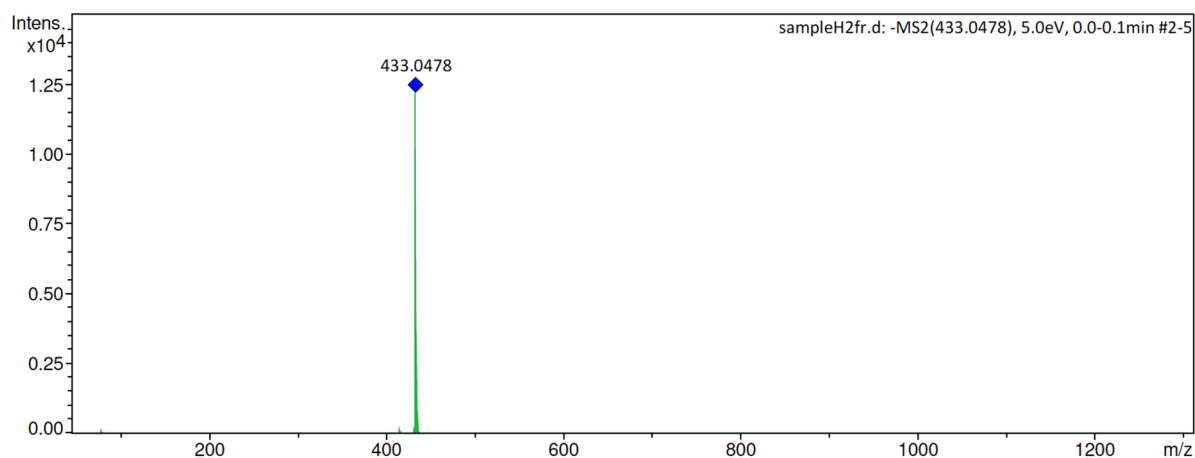

**Figure S38.** HRMS spectrum of **9**.  $m/z$ :  $[M - H]^-$  calcd for  $C_{23}H_{14}O_7P$  433.0483; found 433.0478.

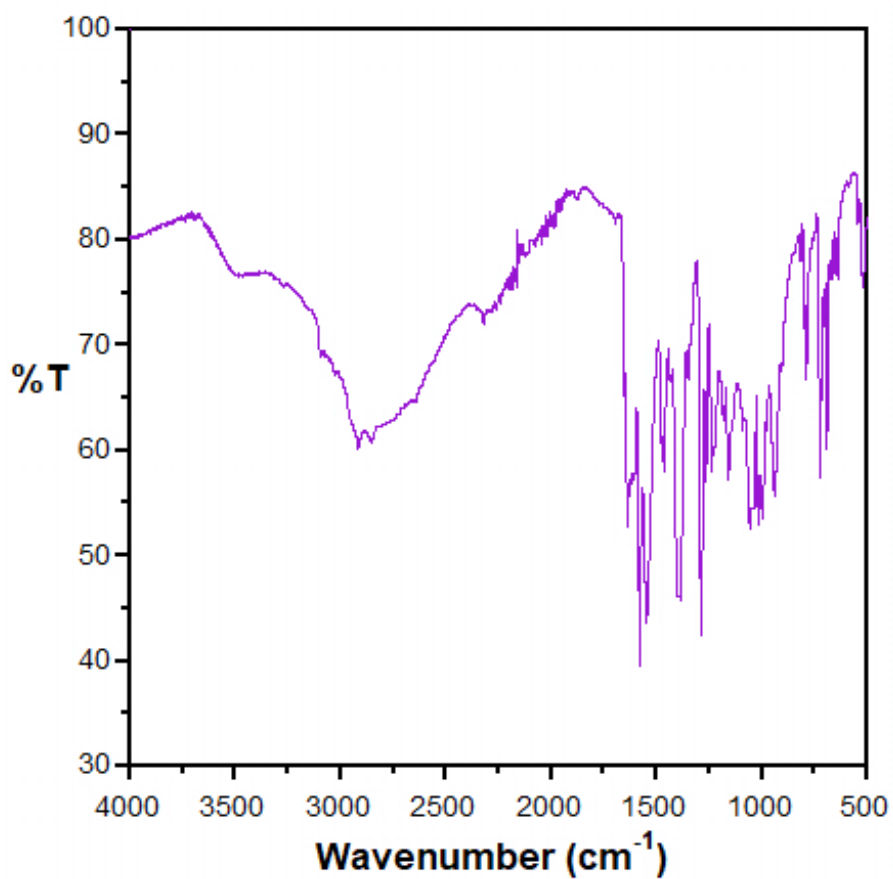

**Figure S39.** ATR-IR spectrum of **9**.
